# Supplementary figures and images for: Alterations in the human oral and gut microbiomes and lipidomics in COVID-19
Source: HighWire-hosted journal article supplement (doi:10.1136/gutjnl-2020-323826), 2021-03-31

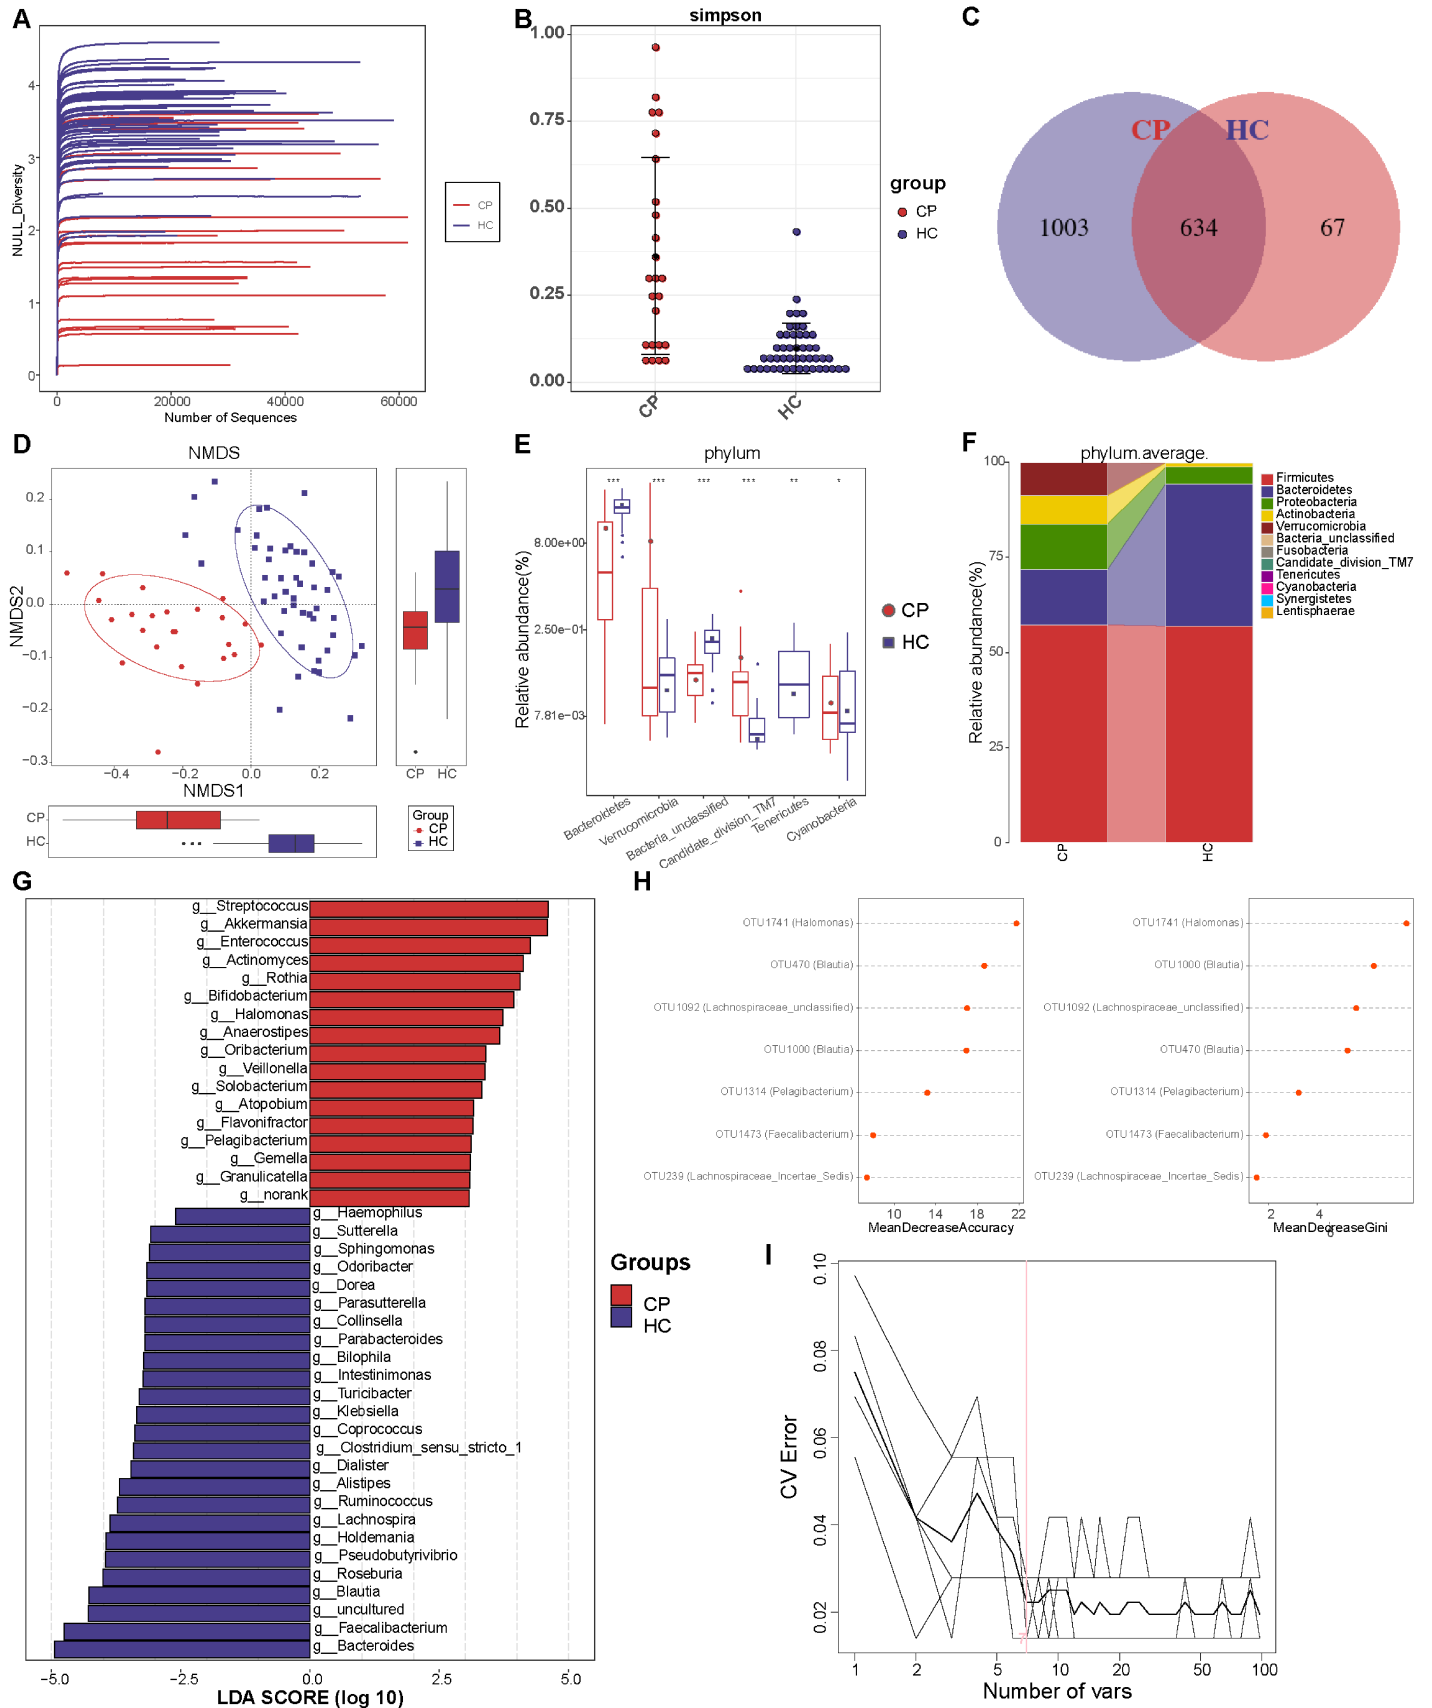

Supplement: gutjnl-2020-323826supp005_data_supplement.pdf [file gutjnl-2020-323826supp005_data_supplement.pdf]

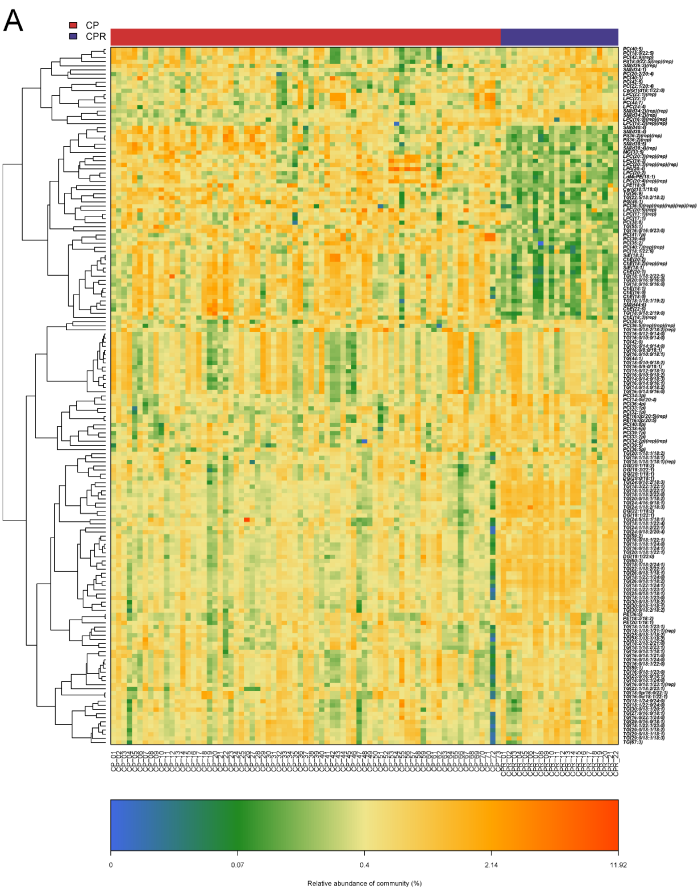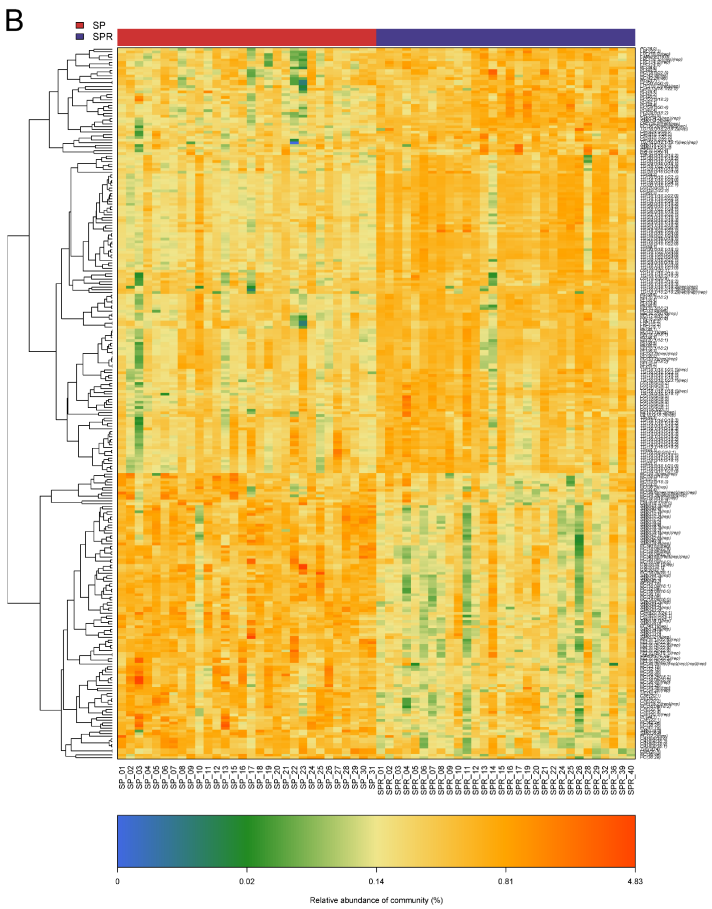

Supplement: gutjnl-2020-323826supp008_data_supplement.pdf [file gutjnl-2020-323826supp008_data_supplement.pdf]
